# Supplementary material
Source: PubMed Central journal article supplement (PMC4793826)
Supplement: shea018641.w1_default.pdf [file shea018641.w1_default.pdf]

### Supplementary figure

Phone intervention performance

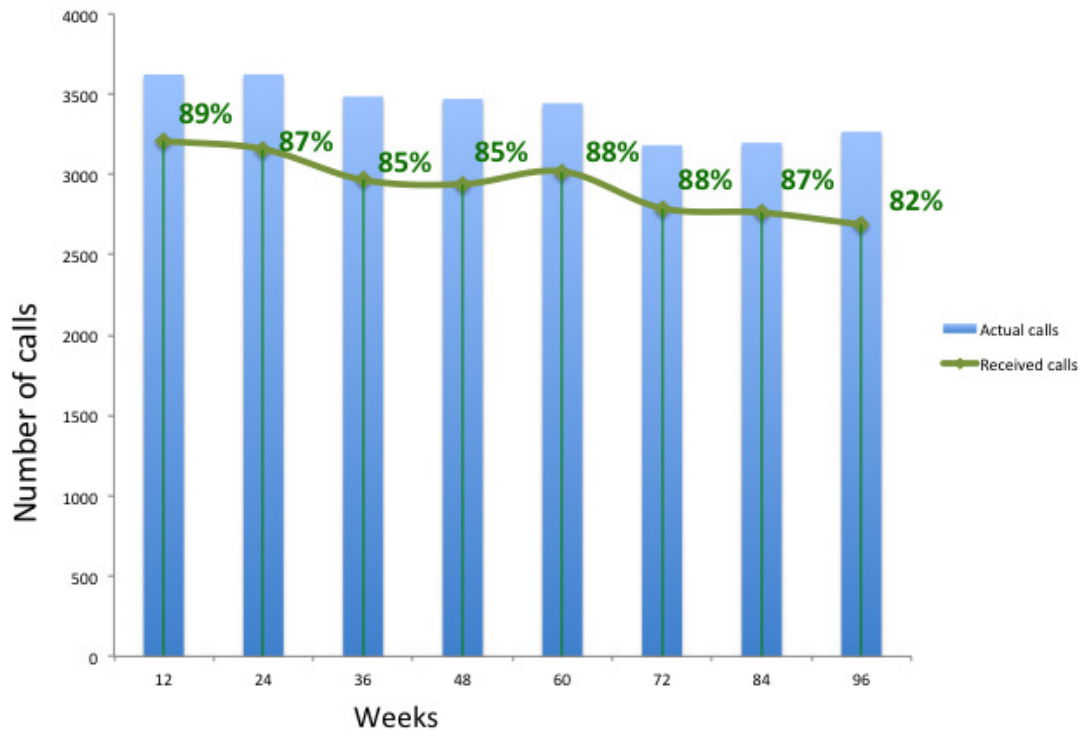

Figure shows the number of automated phone calls that were sent out to patients from week 0 to week 96. The green line shows the percentage of actual calls that were correctly received by participants. These data were obtained directly from the software responsible for generating and recording the calls (Netcore Solutions). In response to a questionnaire, 90% patients in the intervention arm reported getting phone calls >90% of the time; and 76% reported getting picture reminders >90% of the time. Five percent did not view the picture reminders at any time
